# Supplementary material
Source: ML conference proceedings conference paper supplement (https://openreview.net/forum?id=XJIg4kQbkv)
Supplement: supplementary_material [file attachment]

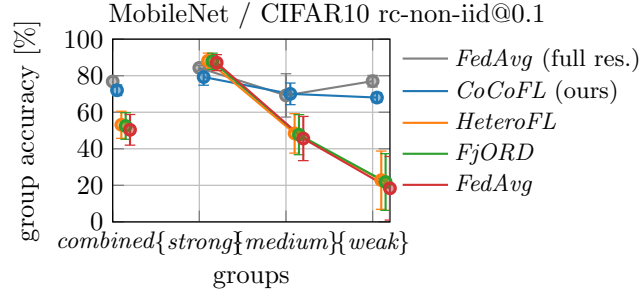

Figure 1: Fairness evaluation as displayed in Figure 4b in the manuscript.

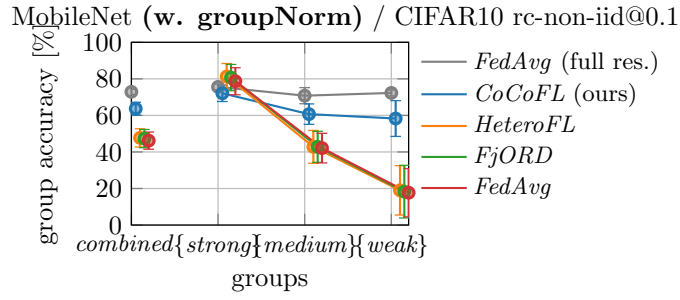

Figure 2: Fairness evaluation in the same setup with groupNorm instead of batchNorm.

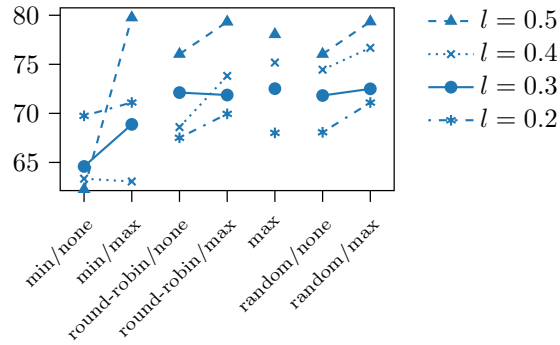

Figure 3: Ablation study for heuristic evaluating with  $l \in [0.2, 0.3, 0.4, 0.5]$
